# Quantitative dialing of gene expression via precision targeting of KRAB repressor

Matthew S. Wilken<sup>1,†</sup>, Christie Ciarlo<sup>1,†</sup>, Jocelynn Pearl<sup>1,†,††</sup>, Elaine Schanzer<sup>1</sup>, Hanna Liao<sup>1</sup>, Benjamin Van Biber<sup>1</sup>, Konstantin Queitsch<sup>1</sup>, Jordan Bloom<sup>1</sup>, Alexander Federation<sup>1</sup>, Reyes Acosta<sup>1</sup>, Shinny Vong<sup>1</sup>, Ericka Otterman<sup>1</sup>, Douglass Dunn<sup>1</sup>, Hao Wang<sup>1</sup>, Pavel Zrazhevskiy<sup>1</sup>, Vivek Nandakumar<sup>1</sup>, Daniel Bates<sup>1</sup>, Richard Sandstrom<sup>1</sup>, Fyodor D. Urnov<sup>1</sup>, Alister Funnell<sup>1</sup>, Shon Green<sup>1</sup>, and John A. Stamatoyannopoulos<sup>1,2,\*</sup>

## Affiliations:

<sup>1</sup>*Altius Institute for Biomedical Sciences (Nonprofit), Seattle, WA, USA.*

<sup>2</sup>*Departments of Genome Sciences and Medicine, University of Washington, Seattle, WA, USA.*

<sup>†</sup>*Equal contribution*

<sup>††</sup>*Current address: Tune Therapeutics, Seattle, WA 98102, USA.*

\* Correspondence: [jstam@altius.org](mailto:jstam@altius.org) or [jstam@uw.edu](mailto:jstam@uw.edu).

## 1 **Abstract**

2 Human genes are regulated quantitatively, yet the ability to specify the expression level of a  
3 native gene accurately and specifically using a defined reagent has remained elusive. Here we  
4 show that precise targeting of KRAB repressive domain within regulatory DNA unlocks an  
5 endogenous quantitative ‘dial’ that can be engaged at nucleotide resolution to program  
6 expression levels across a wide physiologic range, with single-gene specificity and high  
7 reproducibly in primary cells.

8

9

## 10 **Main**

11 In their native state, genes are regulated quantitatively to produce specific biological outcomes.  
12 Achieving such tunable gene expression is a key goal for mechanistic studies of gene function,  
13 therapeutic cell engineering, and synthetic biology. To date, no method has been described that  
14 provides single-gene-specific, incremental control of endogenous expression levels under  
15 uniform dosing conditions, particularly without requiring genome modification.

16 Most approaches to quantitative control of gene expression have relied on genomic integration of  
17 regulatory constructs<sup>1-3</sup>. A synthetic promoter can be placed under control of exogenous small  
18 molecules such as tetracycline to produce a quantitative range of gene expression<sup>4-6</sup>. MicroRNA  
19 elements can be recoded to tune gene expression<sup>3</sup>. While RNAi provides some degree of tunable  
20 repression without genome modification, it is plagued by variable efficacy and widespread off-  
21 target effects<sup>7-10</sup>.

22 In the context of dCas9, synthetic repressor activity can be modulated by small molecule control  
23 of RNA-guided delivery, but achieving defined expression levels is challenging<sup>11</sup>. Genomic  
24 targeting of dCas9-KRAB can be attenuated by engineering mismatched guide RNAs<sup>12</sup>, but this  
25 approach carries significant potential for untoward effects such as off-targeting.

26 Native transcription factors (TFs) convert information encoded in regulatory DNA regions such  
27 as promoters and enhancers into gene expression and cell state outcomes. TFs are modular  
28 proteins that combine a DNA recognition domain with one or more domains that confer specific  
29 functions via interplay with other chromatin-associated proteins<sup>13, 14</sup>. Coupling synthetic DNA  
30 binding domains with naturally-occurring KRAB repressor domains is a widely-applied  
31 approach for modulating gene expression, chiefly for the goal of gene silencing<sup>15-20</sup>. KRAB  
32 domains recruit the KAP1 co-repressor and, in turn, endogenous enzymatic complexes that  
33 methylate histones and DNA and trigger focal heterochromatin formation<sup>15-20</sup>. Despite decades  
34 of work, however, it remains unclear what factors contribute to KRAB activity in the context of a  
35 given proximal regulatory region.

36 Regardless of the DNA targeting modality employed, observed potencies of synthetic KRAB  
37 repressors have been highly variable, and reliably achieving complete repression comparable to  
38 gene knockout has been particularly elusive<sup>7, 21-23</sup>. KRAB also has the potential to trigger  
39 mitotically heritable gene repression<sup>24-27</sup>, yet its application for this purpose has likewise been  
40 confounded by variable effects depending on experimental context and gene targeted<sup>17, 24, 27-30</sup>.

41 Here we report a generalizable approach for achieving quantitative, highly specific, and heritable  
42 gene expression states in primary cells. We demonstrate that KRAB repressor activity is

43 dominantly dependent on the precise genomic position to which it is targeted, providing both a  
44 framework for achieving potent, durable repression of endogenous genes and an explanation for  
45 previously reported discrepancies in KRAB activity. We show that synthetic repressors targeted  
46 to nucleotides that gate near-complete abrogation of gene expression do so with single-gene  
47 specificity and can be readily multiplexed, opening new avenues for precision programming of  
48 genes and cells for both basic and therapeutic applications.

49

## 50 **Results**

### 51 **Nucleotide-precise delivery of KRAB repressor domains to endogenous promoters**

52 To achieve nucleotide-precise targeting of KRAB domains to specific promoter positions, we  
53 utilized *Xanthomonas* TAL effector repeats which enable modular synthesis of DNA binding  
54 domains (DBDs) capable of targeting ~95% of the human genome sequence<sup>31,32</sup>. Synthetic TAL  
55 DBDs (T-DBDs) can be appended at either their C- or N-termini with effector domains  
56 conferring function in mammalian cells, for example the KRAB repressor domain<sup>24,29,33-36</sup>.

57 As a test case, we focused on a well-characterized immune checkpoint gene *TIM3* (*HAVCR2*),  
58 which encodes a cell surface molecule that can be robustly quantified by flow cytometry. We  
59 designed a series of densely spaced synthetic T-DBD-KRAB repressors targeting the *TIM3*  
60 promoter (Fig. 1A, top). To quantify potency, we electroporated each repressor mRNA into  
61 primary CD3<sup>+</sup> T cells and measured surface expression of *TIM3* after 48 hours.

62 Varying the genomic positioning of T-DBDs produced a quantitative landscape of gene  
63 expression (Fig. 1A, bottom). *A priori*, we expected that repressors targeted with close  
64 proximity would be nearly equivalent in function. Instead, we found synthetic repressor activity  
65 was highly variable even between closely spaced repressors. Within this landscape, we observed  
66 a small subset of positions that yielded dramatic drop-offs in gene expression, resulting in near-  
67 complete repression (Fig. 1B). We termed such positions ‘keyhole’ sites for repression.  
68 Repressors targeting keyhole sites produced near-complete gene silencing, which was  
69 accompanied by loss of H3K4me3 and gain of H3K9me3 as expected for KRAB-induced  
70 silencing (Fig. S1).

71 To examine extensibility and quantitative reproducibility of expression levels programmed by  
72 positional targeting of KRAB, we tiled T-DBD-KRABs near the transcription start site of *PD-1*  
73 (*PDCDI*) and quantified PD-1 expression in CD3<sup>+</sup> T cells 48 hours after repressor mRNA  
74 electroporation. We observed a similar quantitative spectrum of repression, including highly  
75 active keyhole sites, spanning the entire range of physiologic PD-1 expression (Fig. 1C). Next,  
76 we repeated the experiment using the same set of T-DBD-KRABs delivered to an independently  
77 collected and temporally separated T cell sample from a different donor. Position-specific  
78 repression levels were highly reproducible between donors and experiments, demonstrating the  
79 robust incremental expression control achievable by targeting specific KRAB to specific  
80 genomic positions (Fig. 1D).

### 81 **A single nucleotide positional trigger for KRAB-induced repression**

82 The precipitous differences in repression we observed as a function of genomic position  
83 suggested that the triggering of repression by KRAB might be under very fine positional  
84 control. To test this, we devised a strategy for migrating a KRAB domain at 1 bp intervals by

85 incrementally extending DNA binding domains anchored from a common 5' position (Fig.  
86 1E). We synthesized a total of 40 T-DBD-KRAB repressors extending from 4 anchor points,  
87 providing per-base coverage of 40 nucleotide positions across both strands of a region within the  
88 *LAG3* promoter encompassing two positions where repressor activity was identified in an initial  
89 screen (Fig. 1E). Quantification of *LAG3* levels from each positional variant individually in  
90 primary CD3<sup>+</sup> T cells revealed discrete positions where migrating the KRAB domain even 1 bp  
91 3' or 5' was sufficient to trigger strong repression from otherwise identical T-DBD-KRAB  
92 molecules (Fig. 1F). Repressor activity did not correlate with genomic features such as DNA  
93 accessibility or distance from the transcription start site of a gene (Fig. S2). Furthermore, there  
94 was no apparent dependence of repressor activity on DBD length, as would be expected if DBD  
95 affinity or residence time were the main determinant of activity<sup>37-39</sup> (Fig. 1F, Fig. S3). Our  
96 results indicate that the epigenetic silencing cascade initiated by KRAB is precisely triggered at  
97 single nucleotide resolution reflecting its linear (and hence rotational) positioning within  
98 promoter chromatin.

### 99 **Potent repressors are single gene-specific**

100 Potency is often accompanied by off-target effects or toxicity. We therefore sought to quantify  
101 the specificity of highly potent repressors for their genic targets by RNA-seq, a sensitive measure  
102 of both on- and off-target effects genome-wide. We delivered potent keyhole repressors of the  
103 immune checkpoint genes *TIM3*, *LAG3*, and *PD-1* to primary CD3<sup>+</sup> T cells both individually  
104 and simultaneously as a pool and performed total RNA-seq at 48h when peak repression is  
105 achieved (Fig. 2A-C left, genome browser views). Individual repressors ablated RNA expression  
106 of their target genes with near complete specificity (Fig. 2A-C right, volcano plots). Of note, the  
107 *LAG3* repressor resulted in down-regulation of the closely positioned gene *PTMS* located ~1kb  
108 upstream (Fig. 2B), consistent with a +/- ~2kb H3K9me3 'halo' produced by KRAB-triggered  
109 silencing (Fig. S1). While *LAG3* was completely repressed, *PTMS* was only partially repressed  
110 (35% of control) (Fig. 2B); both are on-target effects of the same target site.

111 Multiplexing provides an even more stringent test of specificity and effector  
112 independence. Simultaneous delivery of all three repressors produced purely additive effects,  
113 with no loss of potency or specificity (Fig. 2D). We also observed both additivity and dose-  
114 dependence at the level of a single gene targeted by multiple synthetic repressors directed to  
115 different sites within the same promoter (Fig. S4). Taken together, these results indicate that  
116 even highly potent synthetic repressors exhibit remarkable specificity whether delivered  
117 individually or in multiplex.

### 118 **Transient KRAB-induced repression is reliably mitotically heritable**

119 We next studied the duration of transcriptional repression as a function of synthetic repressor  
120 persistence. Repressor mRNA and protein are rapidly degraded following electroporation, with  
121 protein returning to background levels by 48h post mRNA electroporation as measured by direct  
122 immunofluorescence (Fig. 3A-B). Following CD3/CD28 stimulation, primary T cells begin  
123 cycling with a doubling time of approximately 36 hours (Fig. S5). As such, effects on gene  
124 expression persisting beyond 72 hours reflect mitotically heritable states. In mock transfected  
125 cells, *TIM3* expression peaks at 8 days post stimulation before beginning a gradual decline to  
126 steady state levels of ~40% *TIM3*<sup>+</sup> cells (Fig. 3C, open circles). By contrast, cells receiving the  
127 TM18 repressor show near complete repression of *TIM3* up to day 5 post electroporation (day 7  
128 post stimulation) and persistent repression in a declining subpopulation of cells for another ~20

129 days, the practical limit of T cell culture (Fig. 3C, solid black circles, red trace). Even more  
130 pronounced longitudinal repression was induced by a synthetic repressor targeting *PD-1* and  
131 persisted for approximately two weeks in culture (Fig. 3D). These results show that potent  
132 repression by positionally-targeted KRAB is mitotically heritable, with variable multi-day  
133 kinetics observed for different genes.

134  
135

## 136 Discussion

137 Human genes are regulated quantitatively, and the ability to specify their expression level using  
138 defined reagents would have broad applications in biology and therapeutics<sup>40</sup>. Our results show  
139 that the precise genomic position within the proximal regulatory region of an endogenous human  
140 gene quantitatively specifies the level of repression produced by a KRAB repressor domain  
141 targeted to that position, with some positions conferring near-complete repression. These effects  
142 are independent of DBD length (and hence affinity and residence time<sup>37-39</sup>), affirming the  
143 dominant contribution of genomic position. Position-specific expression levels are quantitative  
144 over a wide range and are highly reproducible, providing an endogenous genomic ‘dial’ that can  
145 be turned to deliver a desired expression level with true single-target specificity. Notably, this  
146 level of functional specificity has not been reported with other editing modalities<sup>24, 29, 41-43</sup>.

147 Beyond a general methodology for programming gene expression, our results also provide a  
148 unifying explanation for the widely variable and sometimes contradictory results obtained to date  
149 using synthetic KRAB-containing repressors. Both the level and durability of repression induced  
150 by KRAB has been reported to vary widely from gene to gene, even when the same types of  
151 constructs are employed<sup>7, 22-24, 29, 30</sup>, suggesting that the KRAB domain might need to be  
152 combined with additional functional domains in order to obtain potent or heritable repression<sup>23</sup>.  
153 However, our results show that this is not the case.

154 Like the DBDs of endogenous transcription factors, TALE DBDs engage the genome in its  
155 native double-stranded form, in contrast to RNA-guided protein-DNA recognition by Cas9,  
156 which involves extensive unwinding and disruption of the DNA template<sup>44, 45</sup>. While some  
157 screening studies have implicitly incorporated low-resolution positional targeting of dCas9-  
158 KRAB<sup>46-48</sup>, this has invariably been in the context of pooled experiments with enrichment-based  
159 readouts that lack quantitative information about gene expression levels per guide tested.  
160 Moreover, any observed positional variability in dCas9-KRAB-induced repression must be  
161 corrected for nucleosome occupancy which has a dominant effect on dCas9 engagement<sup>46, 47</sup>.

162 Recent studies have reported both naturally-occurring and synthetic KRAB variants with  
163 increased intrinsic potency relative to conventional KRAB<sup>21, 49</sup>. We note that the reported  
164 relative repressive contribution of novel KRAB variants is typically considerably smaller than  
165 the wide dynamic range conferred by nucleotide-positional targeting. As such, an enhanced or  
166 attenuated KRAB domain would be expected to be dominated by position-dependence, though  
167 would offer a strategy for further enhancing or attenuating position-specified effects. Our results  
168 thus suggest that any future studies of the impact of variant KRAB domains or the combination  
169 of KRAB with additional functional domains on gene expression levels and mitotic heritability  
170 should thoroughly account for position dependence.

171 The observed strict dependence of repression on genomic position suggests a structural  
172 mechanism under which a specific positional/rotational presentation of the KRAB domain is

173 necessary to successfully recruit KAP1 and trigger its sequelae. However, despite dramatic  
174 progress in structural biology, a detailed understanding of the biophysical architecture of even a  
175 single human regulatory region remains elusive<sup>50</sup>. Irrespective of the underlying mechanism,  
176 quantitative positional specification of repressive function should have broad applications in the  
177 engineering of endogenous and synthetic gene expression programs.

## 178 **References:**

- 179 1. Deans, T.L., Cantor, C.R. & Collins, J.J. A tunable genetic switch based on RNAi and  
180 repressor proteins for regulating gene expression in mammalian cells. *Cell* **130**, 363-372  
181 (2007).
- 182 2. Li, X.T. et al. tCRISPRi: tunable and reversible, one-step control of gene expression. *Sci*  
183 *Rep* **6**, 39076 (2016).
- 184 3. Michaels, Y.S. et al. Precise tuning of gene expression levels in mammalian cells. *Nat*  
185 *Commun* **10**, 818 (2019).
- 186 4. Gossen, M. & Bujard, H. Tight control of gene expression in mammalian cells by  
187 tetracycline-responsive promoters. *Proc Natl Acad Sci U S A* **89**, 5547-5551 (1992).
- 188 5. Gossen, M. et al. Transcriptional activation by tetracyclines in mammalian cells. *Science*  
189 **268**, 1766-1769 (1995).
- 190 6. Yin, D.X., Zhu, L. & Schimke, R.T. Tetracycline-controlled gene expression system  
191 achieves high-level and quantitative control of gene expression. *Anal Biochem* **235**, 195-  
192 201 (1996).
- 193 7. Evers, B. et al. CRISPR knockout screening outperforms shRNA and CRISPRi in  
194 identifying essential genes. *Nat Biotechnol* **34**, 631-633 (2016).
- 195 8. Jackson, A.L. et al. Expression profiling reveals off-target gene regulation by RNAi. *Nat*  
196 *Biotechnol* **21**, 635-637 (2003).
- 197 9. Scacheri, P.C. et al. Short interfering RNAs can induce unexpected and divergent  
198 changes in the levels of untargeted proteins in mammalian cells. *Proc Natl Acad Sci U S*  
199 *A* **101**, 1892-1897 (2004).
- 200 10. Semizarov, D. et al. Specificity of short interfering RNA determined through gene  
201 expression signatures. *Proc Natl Acad Sci U S A* **100**, 6347-6352 (2003).
- 202 11. Gangopadhyay, S.A. et al. Precision Control of CRISPR-Cas9 Using Small Molecules  
203 and Light. *Biochemistry* **58**, 234-244 (2019).
- 204 12. Jost, M. et al. Titrating gene expression using libraries of systematically attenuated  
205 CRISPR guide RNAs. *Nat Biotechnol* **38**, 355-364 (2020).
- 206 13. Brent, R. & Ptashne, M. A eukaryotic transcriptional activator bearing the DNA  
207 specificity of a prokaryotic repressor. *Cell* **43**, 729-736 (1985).
- 208 14. Lambert, S.A. et al. The Human Transcription Factors. *Cell* **172**, 650-665 (2018).
- 209 15. Bellefroid, E.J., Poncelet, D.A., Lecocq, P.J., Revelant, O. & Martial, J.A. The  
210 evolutionarily conserved Kruppel-associated box domain defines a subfamily of  
211 eukaryotic multifingered proteins. *Proc Natl Acad Sci U S A* **88**, 3608-3612 (1991).
- 212 16. Friedman, J.R. et al. KAP-1, a novel corepressor for the highly conserved KRAB  
213 repression domain. *Genes Dev* **10**, 2067-2078 (1996).
- 214 17. Groner, A.C. et al. The Kruppel-associated box repressor domain can induce reversible  
215 heterochromatinization of a mouse locus in vivo. *J Biol Chem* **287**, 25361-25369 (2012).
- 216 18. Margolin, J.F. et al. Kruppel-associated boxes are potent transcriptional repression  
217 domains. *Proc Natl Acad Sci U S A* **91**, 4509-4513 (1994).
- 218 19. Nawrath, M., Pavlovic, J. & Moelling, K. Inhibition of human hematopoietic tumor  
219 formation by targeting a repressor Myb-KRAB to DNA. *Cancer Gene Ther* **7**, 963-972  
220 (2000).
- 221 20. Vissing, H., Meyer, W.K., Aagaard, L., Tommerup, N. & Thiesen, H.J. Repression of  
222 transcriptional activity by heterologous KRAB domains present in zinc finger proteins.  
223 *FEBS Lett* **369**, 153-157 (1995).

- 224 21. Alerasool, N., Segal, D., Lee, H. & Taipale, M. An efficient KRAB domain for CRISPRi  
225 applications in human cells. *Nat Methods* **17**, 1093-1096 (2020).
- 226 22. Gilbert, L.A. et al. CRISPR-mediated modular RNA-guided regulation of transcription in  
227 eukaryotes. *Cell* **154**, 442-451 (2013).
- 228 23. Yeo, N.C. et al. An enhanced CRISPR repressor for targeted mammalian gene regulation.  
229 *Nat Methods* **15**, 611-616 (2018).
- 230 24. Amabile, A. et al. Inheritable Silencing of Endogenous Genes by Hit-and-Run Targeted  
231 Epigenetic Editing. *Cell* **167**, 219-232 e214 (2016).
- 232 25. Ayyanathan, K. et al. Regulated recruitment of HP1 to a euchromatic gene induces  
233 mitotically heritable, epigenetic gene silencing: a mammalian cell culture model of gene  
234 variegation. *Genes Dev* **17**, 1855-1869 (2003).
- 235 26. Bintu, L. et al. Dynamics of epigenetic regulation at the single-cell level. *Science* **351**,  
236 720-724 (2016).
- 237 27. Gjaltema, R.A.F. et al. KRAB-Induced Heterochromatin Effectively Silences PLOD2  
238 Gene Expression in Somatic Cells and is Resilient to TGFbeta1 Activation. *Int J Mol Sci*  
239 **21** (2020).
- 240 28. Mandegar, M.A. et al. CRISPR Interference Efficiently Induces Specific and Reversible  
241 Gene Silencing in Human iPSCs. *Cell Stem Cell* **18**, 541-553 (2016).
- 242 29. Mlambo, T. et al. Designer epigenome modifiers enable robust and sustained gene  
243 silencing in clinically relevant human cells. *Nucleic Acids Res* **46**, 4456-4468 (2018).
- 244 30. O'Geen, H. et al. Ezh2-dCas9 and KRAB-dCas9 enable engineering of epigenetic  
245 memory in a context-dependent manner. *Epigenetics Chromatin* **12**, 26 (2019).
- 246 31. Boch, J. et al. Breaking the code of DNA binding specificity of TAL-type III effectors.  
247 *Science* **326**, 1509-1512 (2009).
- 248 32. Moscou, M.J. & Bogdanove, A.J. A simple cipher governs DNA recognition by TAL  
249 effectors. *Science* **326**, 1501 (2009).
- 250 33. Cong, L., Zhou, R., Kuo, Y.C., Cunniff, M. & Zhang, F. Comprehensive interrogation of  
251 natural TALE DNA-binding modules and transcriptional repressor domains. *Nat*  
252 *Commun* **3**, 968 (2012).
- 253 34. Maeder, M.L. et al. Targeted DNA demethylation and activation of endogenous genes  
254 using programmable TALE-TET1 fusion proteins. *Nat Biotechnol* **31**, 1137-1142 (2013).
- 255 35. Mendenhall, E.M. et al. Locus-specific editing of histone modifications at endogenous  
256 enhancers. *Nature Biotechnology* **31**, 1133-1136 (2013).
- 257 36. Zhang, Z., Wu, E., Qian, Z. & Wu, W.S. A multicolor panel of TALE-KRAB based  
258 transcriptional repressor vectors enabling knockdown of multiple gene targets. *Sci Rep* **4**,  
259 7338 (2014).
- 260 37. Clauss, K. et al. DNA residence time is a regulatory factor of transcription repression.  
261 *Nucleic Acids Res* **45**, 11121-11130 (2017).
- 262 38. Geiger-Schuller, K., Mitra, J., Ha, T. & Barrick, D. Functional instability allows access to  
263 DNA in longer transcription Activator-Like effector (TALE) arrays. *Elife* **8** (2019).
- 264 39. Rinaldi, F.C., Doyle, L.A., Stoddard, B.L. & Bogdanove, A.J. The effect of increasing  
265 numbers of repeats on TAL effector DNA binding specificity. *Nucleic Acids Res* **45**,  
266 6960-6970 (2017).
- 267 40. Keren, L. et al. Massively Parallel Interrogation of the Effects of Gene Expression Levels  
268 on Fitness. *Cell* **166**, 1282-1294 e1218 (2016).



- 269 41. Grimmer, M.R. et al. Analysis of an artificial zinc finger epigenetic modulator:  
270 widespread binding but limited regulation. *Nucleic Acids Res* **42**, 10856-10868 (2014).
- 271 42. Stojic, L. et al. Specificity of RNAi, LNA and CRISPRi as loss-of-function methods in  
272 transcriptional analysis. *Nucleic Acids Res* **46**, 5950-5966 (2018).
- 273 43. Thakore, P.I. et al. Highly specific epigenome editing by CRISPR-Cas9 repressors for  
274 silencing of distal regulatory elements. *Nat Methods* **12**, 1143-1149 (2015).
- 275 44. Deng, D. et al. Structural basis for sequence-specific recognition of DNA by TAL  
276 effectors. *Science* **335**, 720-723 (2012).
- 277 45. Nishimasu, H. et al. Crystal structure of Cas9 in complex with guide RNA and target  
278 DNA. *Cell* **156**, 935-949 (2014).
- 279 46. Horlbeck, M.A. et al. Compact and highly active next-generation libraries for CRISPR-  
280 mediated gene repression and activation. *Elife* **5** (2016).
- 281 47. Horlbeck, M.A. et al. Nucleosomes impede Cas9 access to DNA in vivo and in vitro.  
282 *Elife* **5** (2016).
- 283 48. Gilbert, L.A. et al. Genome-Scale CRISPR-Mediated Control of Gene Repression and  
284 Activation. *Cell* **159**, 647-661 (2014).
- 285 49. Tycko, J. et al. High-Throughput Discovery and Characterization of Human  
286 Transcriptional Effectors. *Cell* **183**, 2020-2035 e2016 (2020).
- 287 50. Panne, D., Maniatis, T. & Harrison, S.C. An atomic model of the interferon-beta  
288 enhanceosome. *Cell* **129**, 1111-1123 (2007).

289

290 **Acknowledgements:** We thank J. Halow and K. Lee for assistance with cell culture; M.  
291 Diegel and F. Neri for assistance with sequencing; J. Lazar for input on statistical  
292 analysis.

293 **Funding:** This study was funded in part by NIH grants R33HL120752 and  
294 UM1HG009444 to J.A.S. and by a charitable contribution to the Altius Institute from  
295 GlaxoSmithKline PLC (M.S.W., C.C., J.P., E.S., J.B., H.L., B.V.B., R.A., S.V., E.O., D.D.,  
296 H.W., P.Z., V.N., D.B., R.S., A.F., F.D.U., S.G., J.A.S.).

297 **Author contributions:** M.S.W., C.C., J.P., A.F., F.D.U., S.G. and J.A.S. designed the  
298 research. M.S.W., C.C., J.P., E.S., J.B., H.L., B.V.B., K.Q., A.F., R.A., S.V., E.O., and A.F.  
299 performed cell engineering experiments. D.D., H.W., and D.B. performed RNA-seq and  
300 CUT&RUN experiments. P.Z. and V.N. performed imaging experiments. M.S.W., C.C.,  
301 J.P., J.B., R.S., P.V., and V.N. analyzed data. M.S.W., C.C., S.G., and J.A.S. wrote the  
302 manuscript with input from other co-authors.

303 **Competing interests:** M.S.W., C.C., S.G., A.F., F.D.U., and J.A.S. are listed as inventors  
304 on patent applications related to the subject matter of the paper; J.P. is an employee of  
305 Tune Therapeutics, a for-profit biotechnology company.

306 **Data and materials availability:** All RNA-seq and imaging data, software code used  
307 for analysis, protein sequences, protocols, and materials used in the experiments and  
308 data analysis will be made freely available.

Fig. 1

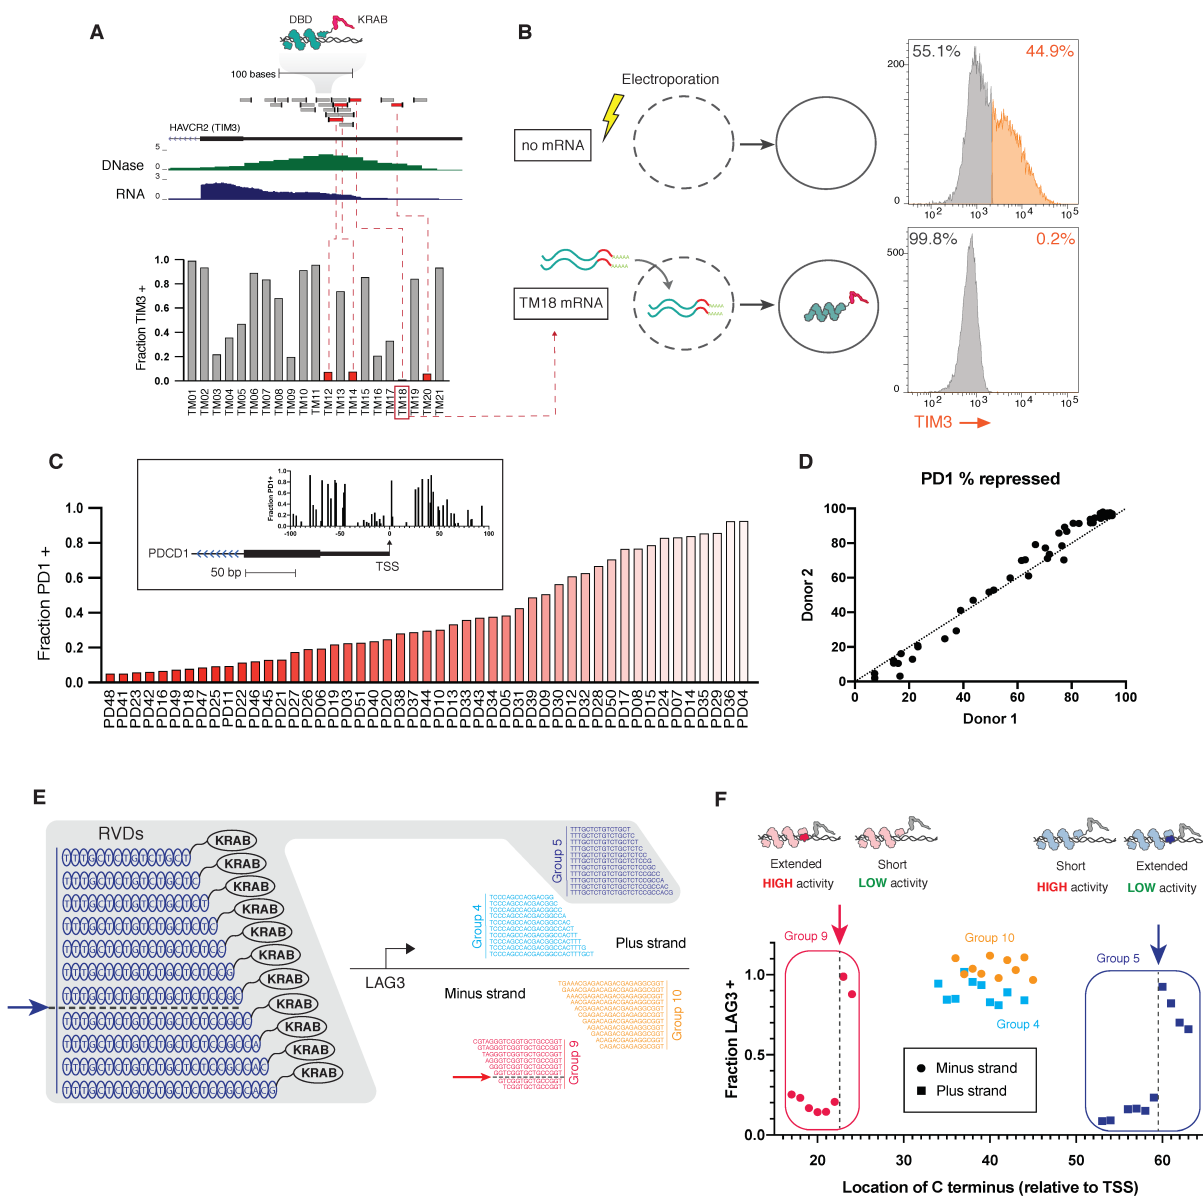

309  
 310 **Fig. 1. Quantitative repression achieved by nucleotide-precise targeting of KRAB to promoter DNA.** (a)  
 311 Selection of repressors at the *TIM3* (*HAVCR2*) promoter. Top: DNA binding domains (grey boxes) are shown to  
 312 scale; tick marks indicate position of C-terminal KRAB domain. Red indicates ‘keyhole’ sites: DBD-KRABs with  
 313 >90% repression. Center: DNase-seq and RNA-seq normalized tag density. Bottom: Fraction of TIM3+ cells  
 314 (normalized to mock transfection) as quantified by flow cytometry 48 hours after electroporation of repressor  
 315 mRNA into activated CD3+ human T-cells. (b) TIM3 surface protein expression quantified by flow cytometry at 48  
 316 hours post-transfection (plots representative of three independent experiments). (c) SynTFs targeting different  
 317 locations in the *PD-1* (*PDCDI*) promoter produce a finely graded range of repression levels. Fraction PD-1+ cells  
 318 (normalized to mock transfection) was quantified by flow cytometry 48 hours after electroporation of repressor  
 319 mRNA into activated CD3+ human T-cells. Inset shows repressor activity as a function of position of C-terminal  
 320 KRAB domain. (d) Percent repression of PD-1 in two independent experiments using CD3+ T cells from two  
 321 different donors. Each point represents an individual synTF from (c). Dotted line  $x=y$  shown for reference. (e) T-  
 322 DBDs targeting seed sequences in the *LAG3* promoter were sequentially extended by one repeat unit to produce

323 groups of T-DBD-KRABs with different positioning of the C-terminal KRAB (see example group). (f) Fraction  
 324 LAG3+ cells at 2 days post-transfection as measured by flow cytometry, normalized to no RNA controls. X-axis  
 325 indicates the location of the KRAB domain relative to the *LAG3* TSS. Groups 5 and 9 are highlighted to demonstrate  
 326 loss/gain of repression activity when the KRAB domain was moved by one nucleotide.

Fig. 2

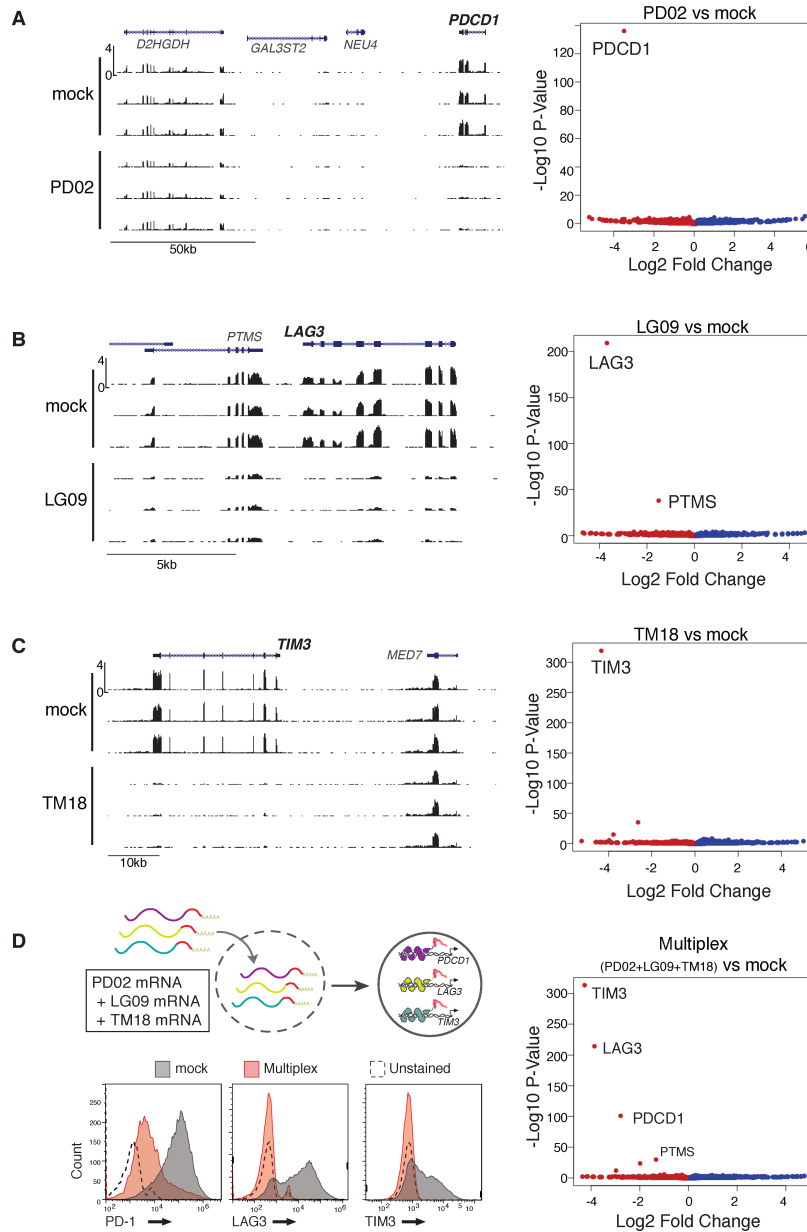

327

328 **Fig. 2. High specificity of keyhole repressors singly and in multiplex.** (a) Left: RNA-seq tag density (scale bar in  
 329 upper left) in the *PDCD1* (*PD-1*) locus following blank electroporation (top tracks, three independent replicates),  
 330 and delivery of synthetic repressor PD02 targeting *PDCD1* (bottom tracks, three independent  
 331 replicates). Right: Volcano plot showing differential gene expression (RNA-seq q-value, vertical axis) following  
 332 PD02 repressor delivery. (b) Results for *LAG3* synthetic repressor, as for (a). (c) Results for *TIM3* repressor, as for  
 333 (a, b). Note that in addition to complete repression of *LAG3*, the *PTMS* gene located 1.2kb upstream is partly

334 repressed. (d) Left, co-delivery of PD02, LG09, and TM18 results in repression of target genes similar to  
 335 individually delivered repressors. Right, volcano plot of differential gene expression (RNA-seq) q-values for co-  
 336 delivered repressors consistent with linearly additive (and independent) contribution of each repressor.  
 337  
 338

**Fig. 3**

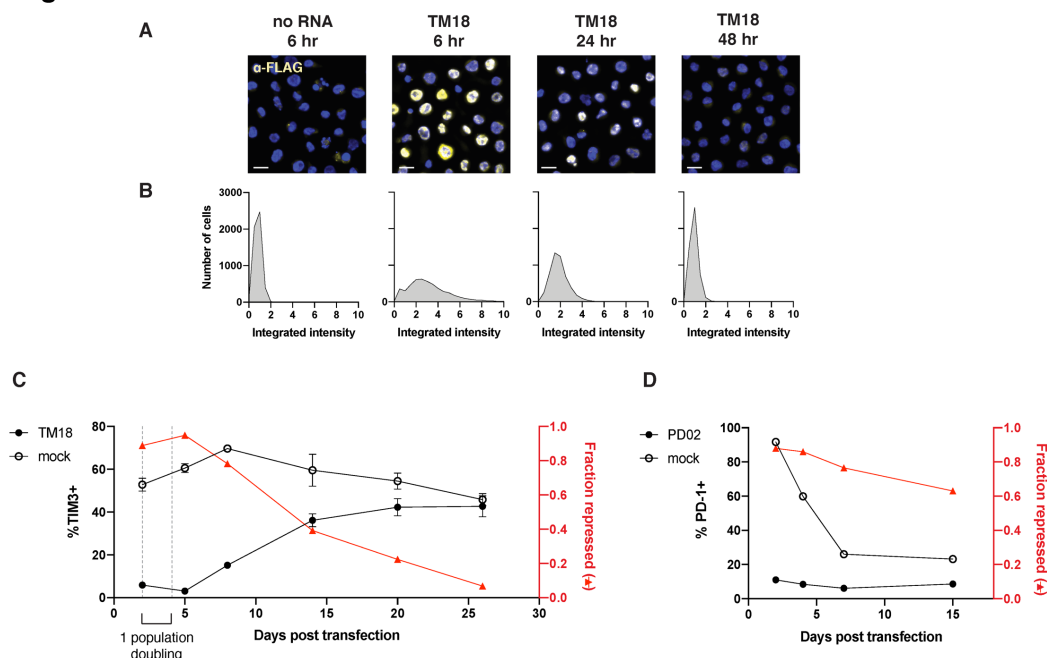

339  
 340 **Fig. 3. Mitotically heritable repression produced by targeting keyhole sites.** (a) Expression of repressor protein  
 341 over time. Cells were electroporated with either no RNA or the *TIM3* repressor TM18 at time 0, and TM18 protein  
 342 levels were determined by anti-FLAG immunofluorescence (yellow) for up to 48 hours. Nuclear DAPI staining is  
 343 shown in blue. Scale bar indicates 10  $\mu$ m. (b) Histograms show integrated anti-FLAG fluorescence intensity per  
 344 nucleus over a population of cells with a bin size of 0.5. (c) Kinetics of *TIM3* repression by synthetic repressor  
 345 TM18. Primary T cells were electroporated with either no RNA or TM18 at day 0, and *TIM3* expression was  
 346 determined by cell surface antibody staining and flow cytometry for 26 days. Cells with greater fluorescence  
 347 intensity than unstained control were considered TIM3+. Percent TIM3+ cells is indicated by dark colored lines and  
 348 left y-axis. Fraction of cells with *TIM3* repressed (%TIM3 negative cells in TM18-treated cells relative to no RNA  
 349 control) is indicated by the right y-axis and red line. Bars indicate standard deviation of two electroporations in the  
 350 same experiment. Repression was maintained through a time period equivalent to one population doubling.  
 351 Population doubling time was calculated assuming a constant proliferation rate and cell counts at days 2 and 5. (d)  
 352 Kinetics of *PD-1* repression by synthetic repressor PD02 as in (a). PD-1 expression was determined over the course  
 353 of 15 days post-electroporation.  
 354  
 355
